# Supplementary material for: Immune Checkpoint Inhibitors Plus Single-Agent Chemotherapy for Advanced Non-Small-Cell Lung Cancer After Resistance to EGFR-TKI
Source: PubMed Central journal article supplement (PMC8488293; doi:10.3389/fonc.2021.700023), 2021-09-20
Supplement: DataSheet_1.pdf [file DataSheet_1.pdf]

The next generation sequencing data of the patients after EGFR-TKIs resistance

| Patient ID | Specimen type | Gene    | Exon_Rank | Description             | AF     | Mutation_Type                   |
|------------|---------------|---------|-----------|-------------------------|--------|---------------------------------|
| A-3        | FFP           | PTEN    | 2         | c.80-1G>C               | 0.2553 | splice_acceptor                 |
| A-3        | FFP           | SMARCA4 | 17        | p.E821G                 | 0.3891 | missense_varian                 |
| A-3        | FFP           | RNF43   | 9         | p.E746fs                | 0.5014 | frameshift_varian<br>t          |
| A-3        | FFP           | FAT3    | 7         | c.4611+8C><br>A         | 0.2597 | intron_variant                  |
| A-3        | FFP           | NOTCH1  | 34        | p.A2553=                | 0.4227 | synonymous_var<br>iant          |
| A-3        | FFP           | LRP1B   | 80        | p.G4075=                | 0.0873 | synonymous_var<br>iant          |
| A-3        | FFP           | EGFR    | 20        | p.C797S                 | 0.1207 | missense_varian                 |
| A-3        | FFP           | EGFR    | 23        | p.G930E                 | 0.1034 | missense_varian                 |
| A-3        | FFP           | EGFR    | 21        | p.L858R                 | 0.197  | missense_varian                 |
| A-3        | FFP           | TP53    | 8         | p.T284fs                | 0.4691 | frameshift_varian<br>t          |
| A-3        | FFP           | EGFR    | 20        | p.T790M                 | 0.1291 | missense_varian                 |
| A-3        | FFP           | EGFR    | NA        | cn_amp                  | 3.33   | cn_amp                          |
| A-3        | FFP           | RAC1    | NA        | cn_amp                  | 3.94   | cn_amp                          |
| A-4        | PLA           | EGFR    | 19        | p.E746_A75<br>0delELREA | 0.0776 | del                             |
| A-4        | PLA           | EGFR    | 20        | p.T790M                 | 0.0688 | snv                             |
| A-4        | PLA           | TP53    | 8         | p.G262Vfs*8<br>3        | 0.0672 | snv                             |
| A-5        | PLA           | STAG2   | 30        | p.R1033*                | 0.0211 | stop_gained                     |
| A-5        | PLA           | TP53    | 5         | p.Q136*                 | 0.0107 | stop_gained                     |
| A-5        | PLA           | EGFR    | 21        | p.L858R                 | 0.0075 | missense_varian                 |
| A-6        | PLA           | EGFR    | 19        | p.P753_I759<br>delinsA  | 0.03   | delins                          |
| A-6        | PLA           | EGFR    | 20        | p.T790M                 | 0.011  | snv                             |
| A-6        | PLA           | RBM10   | 15        | p.E624Nfs*1<br>45       | 0.006  | del                             |
| A-7        | FFP           | HGF     | 14        | p.C519=                 | 0.3074 | synonymous_var<br>iant          |
| A-7        | FFP           | PRKDC   | 33        | p.V1399E                | 0.7425 | missense_varian                 |
| A-7        | FFP           | TP53    | 8         | p.C277Y                 | 0.7754 | missense_varian                 |
| A-7        | FFP           | PDGFRB  | 22        | p.N1019=                | 0.2849 | synonymous_var<br>iant          |
| A-7        | FFP           | CARD11  | 17        | c.2143-<br>19C>T        | 0.2513 | intron_variant                  |
| A-7        | FFP           | ASXL1   | 12        | p.L1488V                | 0.3009 | missense_varian                 |
| A-7        | FFP           | AXIN1   | 6         | p.P494=                 | 0.6296 | synonymous_var<br>iant          |
| A-7        | FFP           | FGFR2   | 14        | p.I623L                 | 0.6331 | missense_varian                 |
| A-7        | FFP           | BCL2    | 3         | p.H238Q                 | 0.5699 | missense_varian                 |
| A-7        | FFP           | PIK3CB  | 2         | p.W60R                  | 0.4326 | missense_varian                 |
| A-7        | FFP           | FGFR4   | 3         | p.R78L                  | 0.2578 | missense_varian                 |
| A-7        | FFP           | EGFR    | 20        | p.C797G                 | 0.1222 | missense_varian                 |
| A-7        | FFP           | EGFR    | 20        | p.T790M                 | 0.2473 | missense_varian                 |
| A-7        | FFP           | EGFR    | 19        | p.E746_A75<br>0del      | 0.9124 | disruptive_infram<br>e_deletion |

|     |     |        |                     |                                       |        |                             |
|-----|-----|--------|---------------------|---------------------------------------|--------|-----------------------------|
| A-7 | FFP | IKZF1  | 4                   | p.S88=                                | 0.0601 | synonymous_variant          |
| A-7 | FFP | ERBB3  | NA                  | cn_amp                                | 5.4    | cn_amp                      |
| A-7 | FFP | GLI1   | NA                  | cn_amp                                | 5      | cn_amp                      |
| A-7 | FFP | EGFR   | NA                  | cn_amp                                | 15     | cn_amp                      |
| A-7 | FFP | MDM2   | NA                  | cn_amp                                | 5.4    | cn_amp                      |
| A-7 | FFP | NFKBIA | NA                  | cn_amp                                | 37.5   | cn_amp                      |
| A-7 | FFP | NKX2-1 | NA                  | cn_amp                                | 60.9   | cn_amp                      |
| A-7 | FFP | CDK4   | NA                  | cn_amp                                | 5.3    | cn_amp                      |
| A-7 | FFP | ARID2  | NA                  | cn_amp                                | 4.9    | cn_amp                      |
| A-7 | FFP | ZNF217 | NA                  | cn_amp                                | 4.6    | cn_amp                      |
| A-7 | FFP | KMT2D  | NA                  | cn_amp                                | 4.8    | cn_amp                      |
| A-7 | FFP | FOXA1  | NA                  | cn_amp                                | 44     | cn_amp                      |
| A-7 | FFP | IKZF1  | NA                  | cn_amp                                | 11.6   | cn_amp                      |
| A-7 | FFP | PARP1  | intergenic_intron12 | intergenic(LOC101927851,TOMM20)-PARP1 | 0.363  | gene_fusion                 |
| A-7 | FFP | RAD50  | Intron3_Intron2     | C5orf67-RAD50                         | 0.3532 | gene_fusion                 |
| A-8 | FFP | EGFR   | 19                  | p.E746_A750del                        | 0.121  | del                         |
| A-8 | FFP | TP53   | 5                   | p.Y163C                               | 0.383  | snv                         |
| A-8 | FFP | EGFR   | NA                  | cn_amp                                | 1.8    | cn_amp                      |
| B-1 | PLA | EGFR   | 21                  | p.L858R                               | 0.7016 | missense_variant            |
| B-1 | PLA | EGFR   | NA                  | cn_amp                                | 4.49   | cn_amp                      |
| B-2 | PLA | EGFR   | 19                  | p.E746_A750del                        | 0.0528 | disruptive_inframe_deletion |
| B-2 | PLA | EGFR   | 21                  | p.T790M                               | 0.0059 | missense_variant            |
| B-2 | PLA | NTRK1  | NA                  | cn_amp                                | 0.0209 | cn_amp                      |
| B-2 | PLA | TP53   | 10                  | p.Arg337Leu                           | 0.0238 | missense_variant            |
| B-3 | PLA | TP53   | 6                   | p.I195fs                              | 0.0059 | frameshift_variant          |
| B-3 | PLA | EGFR   | 19                  | p.L747_A750delinsP                    | 0.0081 | disruptive_inframe_deletion |
| B-4 | FLD | MET    | 18                  | p.L1195F                              | 0.0345 | missense_variant            |
| B-4 | FLD | BRCA2  | 15                  | p.V2503=                              | 0.0398 | synonymous_variant          |
| B-4 | FLD | EGFR   | 21                  | p.L858R                               | 0.0326 | missense_variant            |
| B-4 | FLD | FGF4   | 3                   | p.D153N                               | 0.033  | missense_variant            |
| B-5 | FFP | MSH6   | 1                   | p.R26W                                | 0.04   | snv                         |
| B-5 | FFP | PIK3CA | 10                  | p.E542K                               | 0.524  | snv                         |
| B-5 | FFP | EGFR   | 19                  | p.E746_A750del                        | 0.26   | del                         |
| B-5 | FFP | TP53   | 5                   | p.A159V                               | 0.609  | snv                         |
| B-5 | FFP | RAD51D | 3                   | p.S62*                                | 0.011  | snv                         |
| B-5 | FFP | BRCA2  | NA                  | del                                   | 0.7    | del                         |
| B-5 | FFP | RB1    | NA                  | del                                   | 0.7    | del                         |
| B-5 | FFP | ERBB2  | NA                  | snv                                   | 1.9    | snv                         |
| B-5 | FFP | CHEK2  | NA                  | del                                   | 0.7    | del                         |
| B-6 | FFP | TBX15  | 8                   | p.E427K                               | 0.239  | snv                         |
| B-6 | FFP | LRP1B  | 23                  | p.E1175D                              | 0.105  | snv                         |

|     |     |           |          |                 |        |                       |
|-----|-----|-----------|----------|-----------------|--------|-----------------------|
| B-6 | FFP | EGFR      | 19       | p.L747_T751del  | 0.478  | del                   |
| B-6 | FFP | TP53      | IVS7-EX8 | .               | 0.471  | del                   |
| B-6 | FFP | MCL1      | NA       | cn_amp          | 2.6    | cn_amp                |
| B-6 | FFP | RAC1      | NA       | cn_amp          | 2.6    | cn_amp                |
| B-6 | FFP | EGFR      | NA       | cn_amp          | 2.3    | cn_amp                |
| B-6 | FFP | MET       | NA       | cn_amp          | 1.9    | cn_amp                |
| B-6 | FFP | MYC       | NA       | cn_amp          | 1.7    | cn_amp                |
| B-6 | FFP | CCND1     | NA       | cn_amp          | 1.9    | cn_amp                |
| B-6 | FFP | NKX2-1    | NA       | cn_amp          | 2.0    | cn_amp                |
| B-6 | FFP | NTHL1     | NA       | cn_amp          | 2.3    | cn_amp                |
| B-6 | FFP | FANCA     | NA       | cn_amp          | 2.3    | cn_amp                |
| B-6 | FFP | SMAD4     | NA       | del             | 0.6    | del                   |
| B-6 | FFP | CCNE1     | NA       | cn_amp          | 6.6    | cn_amp                |
| B-6 | FFP | RUNX1     | NA       | cn_amp          | 2.4    | cn_amp                |
| B-6 | FFP | TMPRSS2   | NA       | cn_amp          | 2.2    | cn_amp                |
| B-6 | FFP | U2AF1     | NA       | cn_amp          | 2.0    | cn_amp                |
| B-6 | FFP | EIF1AX    | NA       | cn_amp          | 2.4    | cn_amp                |
| B-6 | FFP | BCOR      | NA       | cn_amp          | 2.1    | cn_amp                |
| B-6 | FFP | KDM6A     | NA       | cn_amp          | 1.9    | cn_amp                |
| B-6 | FFP | ARAF      | NA       | cn_amp          | 2.2    | cn_amp                |
| B-6 | FFP | STAG2     | NA       | cn_amp          | 2.0    | cn_amp                |
| B-7 | PLA | APC       | NA       | p.Val1822Asp    | 1      | missense_variant      |
| B-7 | PLA | ATP10B    | NA       | p.Cys217Arg     | 0.998  | missense_variant      |
| B-7 | PLA | BRCA2     | NA       | p.Asn372His     | 0.473  | missense_variant      |
| B-7 | PLA | BRCA2     | NA       | p.Val2466Ala    | 0.9995 | missense_variant      |
| B-7 | PLA | CNOT4     | NA       | p.Val548Ile     | 0.4899 | missense_variant      |
| B-7 | PLA | CYP2D6    | NA       | p.Pro34Ser      | 0.502  | missense_variant      |
| B-7 | PLA | DPP10     | NA       | p.Val405Ile     | 0.9998 | missense_variant      |
| B-7 | PLA | ERBB2     | NA       | p.Ile655Val     | 0.4776 | missense_variant      |
| B-7 | PLA | GKN2      | NA       | p.Ser113Asn     | 0.9999 | missense_variant      |
| B-7 | PLA | KRTAP5-5  | NA       | p.Arg17Leu      | 0.9732 | missense_variant      |
| B-7 | PLA | KRTAP5-5  | NA       | p.Ser157Cys     | 0.9987 | missense_variant      |
| B-7 | PLA | NOTCH2    | NA       | p.Cys19Trp      | 0.5235 | missense_variant      |
| B-7 | PLA | NOTCH4    | NA       | p.Leu13_Leu16de | 0.8422 | nonframeshift_variant |
| B-7 | PLA | OR2T4     | NA       | p.Ile253fs      | 0.9842 | frameshift_variant    |
| B-7 | PLA | OR4A15    | NA       | p.Pro26Ser      | 1      | missense_variant      |
| B-7 | PLA | OR4A15    | NA       | p.Gln256*       | 0.5265 | Nonsense mutation     |
| B-7 | PLA | OR4C6     | NA       | p.Ile133Thr     | 0.9998 | missense_variant      |
| B-7 | PLA | PDE4DIP   | NA       | p.Ala1066Thr    | 0.4672 | missense_variant      |
| B-7 | PLA | POM121L12 | NA       | p.Gln64Glu      | 0.9997 | missense_variant      |
| B-7 | PLA | PSG5      | NA       | p.Leu18Val      | 1      | missense_variant      |
| B-7 | PLA | PTEN      | NA       | p.Leu171Val     | 0.4459 | missense_variant      |

|     |     |        |    |                    |        |                             |
|-----|-----|--------|----|--------------------|--------|-----------------------------|
| B-7 | PLA | TNN    | NA | p.Pro930Le         | 0.5028 | missense_varian             |
| B-7 | PLA | TP53   | NA | p.Pro72Arg         | 0.4906 | missense_varian             |
| B-7 | PLA | TRIM58 | NA | p.Thr374Met        | 0.4926 | missense_varian             |
| B-7 | PLA | UGT1A1 | NA | p.Gly71Arg         | 0.5044 | missense_varian             |
| B-8 | PLA | EGFR   | 20 | p.C797S            | 0.0014 | missense_varian             |
| B-8 | PLA | EGFR   | 21 | p.L858R            | 0.0037 | missense_varian             |
| B-8 | PLA | EGFR   | 20 | p.T790M            | 0.0038 | missense_varian             |
| B-8 | PLA | POLE   | NA | cn_amp             | 2.8    | cn_amp                      |
| B-9 | PLA | EGFR   | 19 | p.E746_T751delinsA | 0.0243 | disruptive_inframe_deletion |
| B-9 | PLA | EPHA5  | 3  | p.T150I            | 0.0065 | missense_varian             |
| B-9 | PLA | PTPRD  | 28 | p.T980=            | 0.0071 | synonymous_variant          |
| B-9 | PLA | EGFR   | 20 | p.T790M            | 0.0124 | missense_varian             |
| B-9 | PLA | TP53   | 7  | p.C238F            | 0.0121 | missense_varian             |
